# Supplementary material
Source: PubMed Central journal article supplement (PMC6302934)
Supplement: jciinsight-3-121689-s050.pdf [file jciinsight-3-121689-s050.pdf]

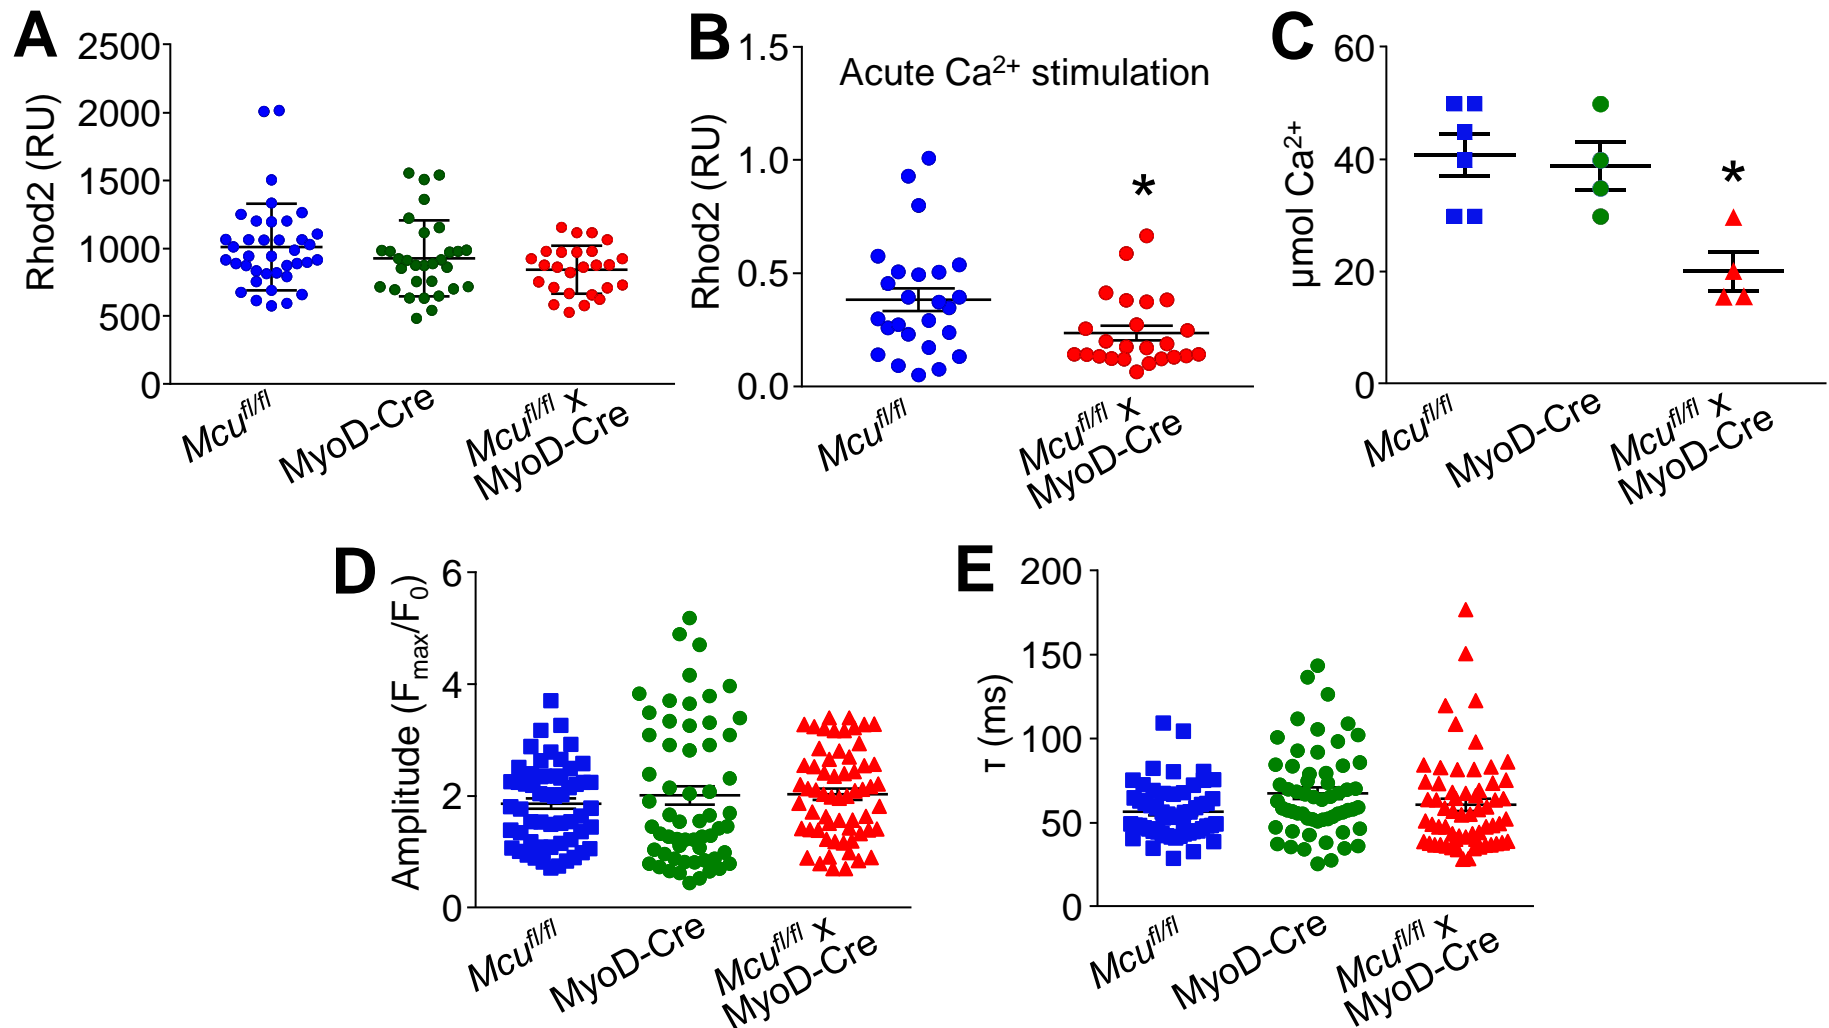

**Supplemental Figure 1.** (A) Baseline mitochondrial Ca<sup>2+</sup> measurement with Rhod2 fluorescence (relative units, RU) in intact primary FDB myofibers; *Mcu<sup>fl/fl</sup>* n = 32 fibers from 6 mice/isolations; *MyoD-Cre* n = 20 cells from 3 mice/isolations; *Mcu<sup>fl/fl</sup>-MyoD-Cre* n = 25 cells from 5 mice/isolations. (B) Peak amplitude of average axial mitochondrial Rhod2 fluorescence (in relative units, RU) to measure Ca<sup>2+</sup> uptake in saponin permeabilized FDB myofibers challenged with an acute bolus of 20 µM Ca<sup>2+</sup> (from Figure 1D). Fibers were harvested from *Mcu<sup>fl/fl</sup>-MyoD-Cre* (n = 24 cells from 4 isolations/mice) and *Mcu<sup>fl/fl</sup>* (n = 24 cells from 4 isolations/mice) mice. Data are plotted as mean ± SEM. \* p ≤ 0.05. (C) Quantification of mitochondrial Ca<sup>2+</sup> capacity prior to onset of permeability transition (*MyoD-Cre*, n = 4 and *MCU<sup>fl/fl</sup>*, n = 6) or uniporter complex inhibition (*Mcu<sup>fl/fl</sup>-MyoD-Cre*, n = 4). One-way ANOVA with Dunnett's multiple comparisons test was used to analyze groups. \* P < 0.05 versus *MyoD-Cre* control. (D and E) Fluo-4AM loaded FDB myofibers stimulated at 1 Hz to measure maximal amplitude of the intracellular Ca<sup>2+</sup> transient (D) and total Ca<sup>2+</sup> clearance time (E). Number of samples are shown in the scatter plots. Data are plotted as mean ± SEM. \* p ≤ 0.05. Students 2-tailed t-test or one-way ANOVA with Dunnett's multiple comparisons test used for statistical analysis.

*Mcu<sup>fl/fl</sup>*

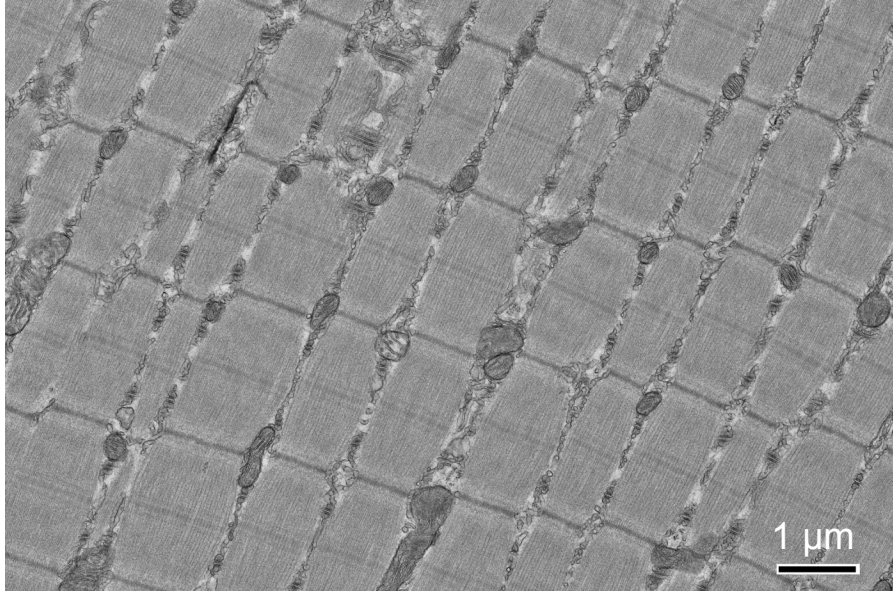

*Mcu<sup>fl/fl</sup>* x MyoD-Cre

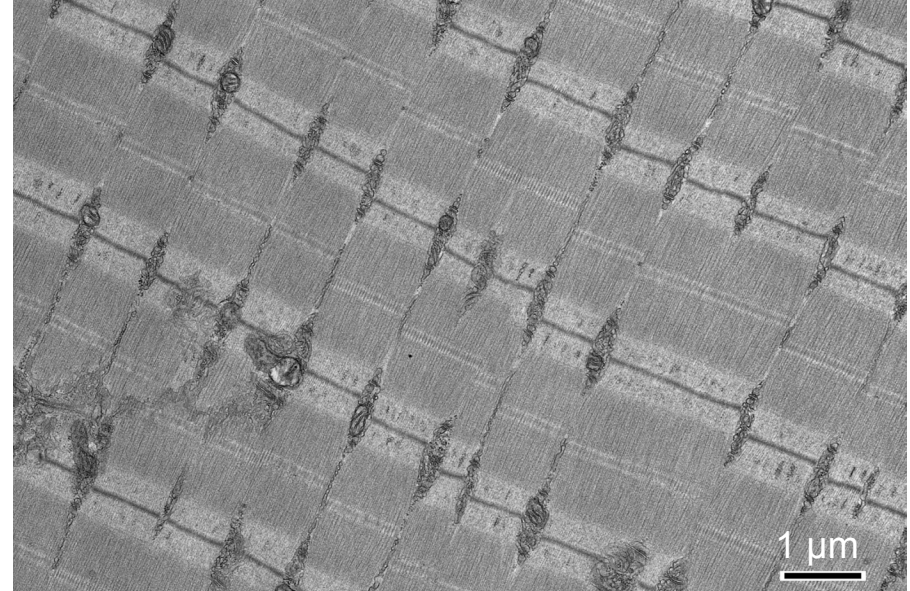

Quad

**Supplemental Figure 2.** Representative electron micrographs from *Mcu<sup>fl/fl</sup>* and *Mcu<sup>fl/fl</sup>-MyoD-Cre* quadriceps muscle sections. The ultrastructure of the muscle myofilaments and mitochondria appear similar between the 2 genotypes of mice.

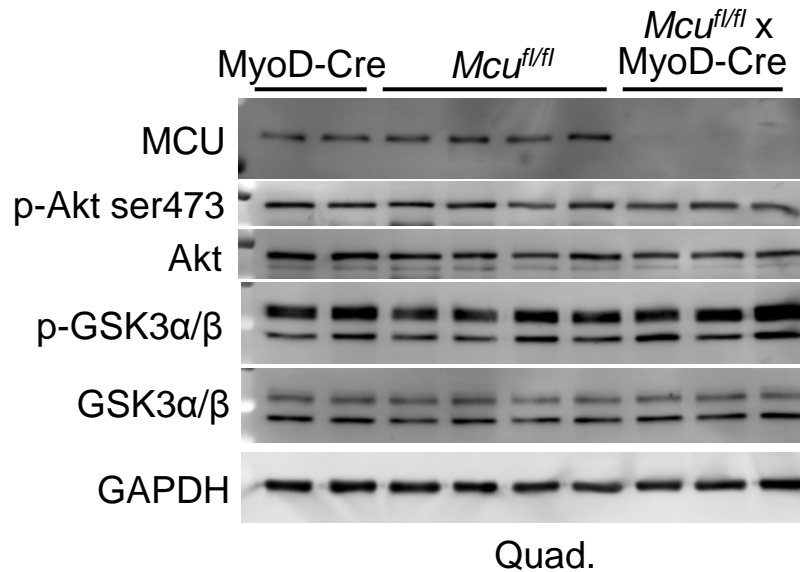

**Supplemental Figure 3. Analyses of Akt and GSKα/β kinase activation.** Western blot analyses of MCU, phosphorylated Akt (p-Akt Ser473), total Akt, phosphorylated GSKα/β and total GSKα/β from quadriceps (Quad) protein lysates from 4 month-old mice of the indicated genotypes of mice. GAPDH was used as a protein loading control. Except for the loss of MCU protein in the skeletal muscle-specific *Mcu*-deleted mice, there were no statistical differences in protein expression or phosphorylation between the groups.

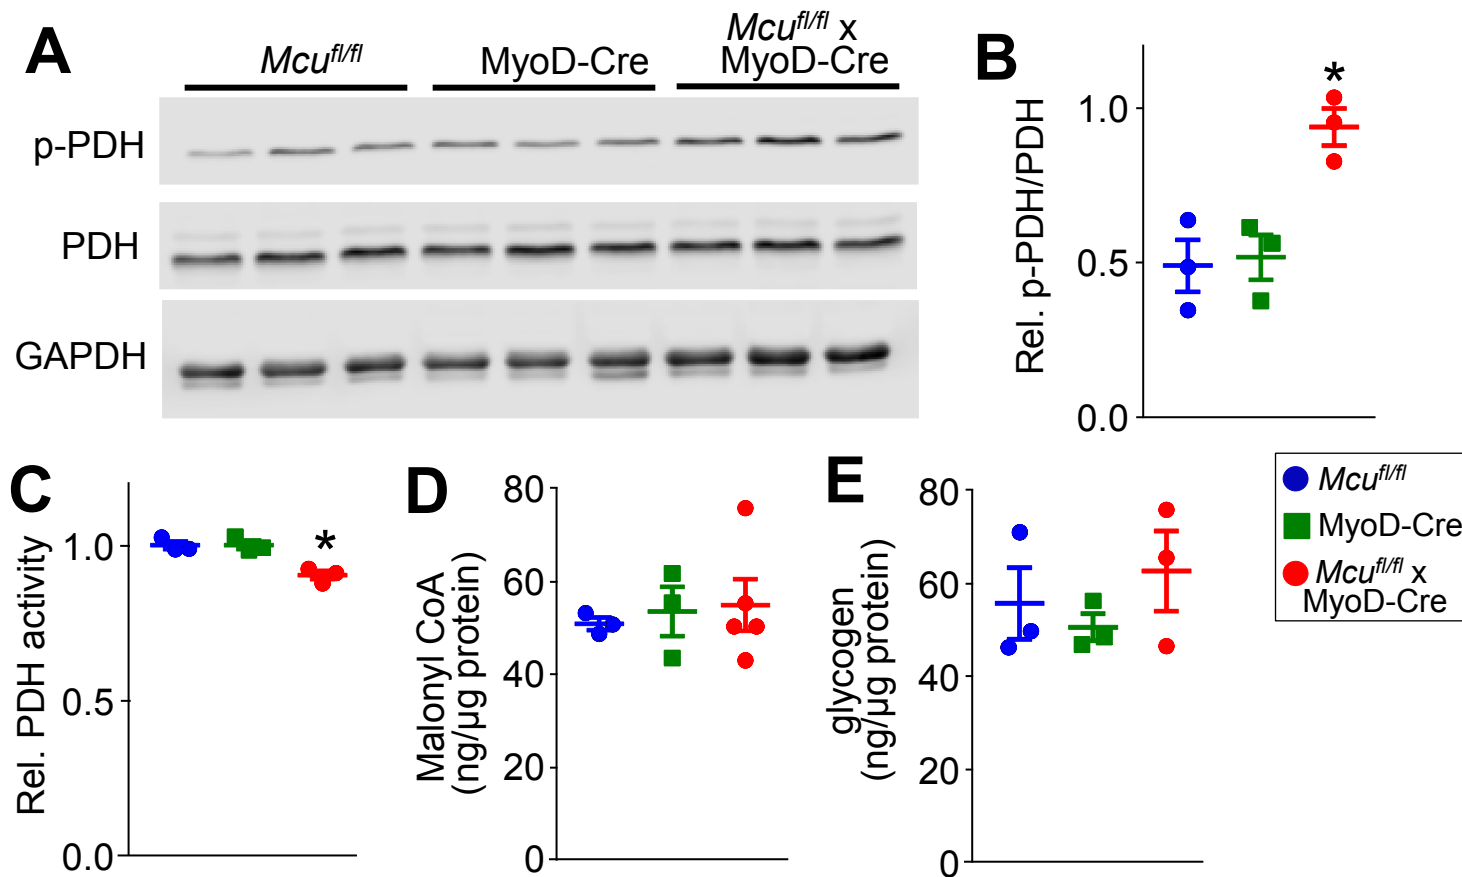

**Supplemental Figure 4.** (A) Western blots for the indicated proteins from the indicated genotypes of mice at rest from quadriceps muscle. (B) Quantitation of phosphorylated-PDH/PDH ratio from 3 independent experiments as shown in A. (C) Relative PDH enzymatic activity from resting quadriceps from the indicated genotypes of mice. (D and E) Quantitation of quadriceps malonyl CoA (D) and glycogen (E) content in quadriceps of the indicated genotypes of mice at rest. Scatter plots show individual values and sample number and means  $\pm$  SEM. \* $P < 0.05$  versus *Mcu<sup>fl/fl</sup>* or MyoD-Cre. One-way ANOVA with Dunnett's multiple comparisons test used for statistical analysis.

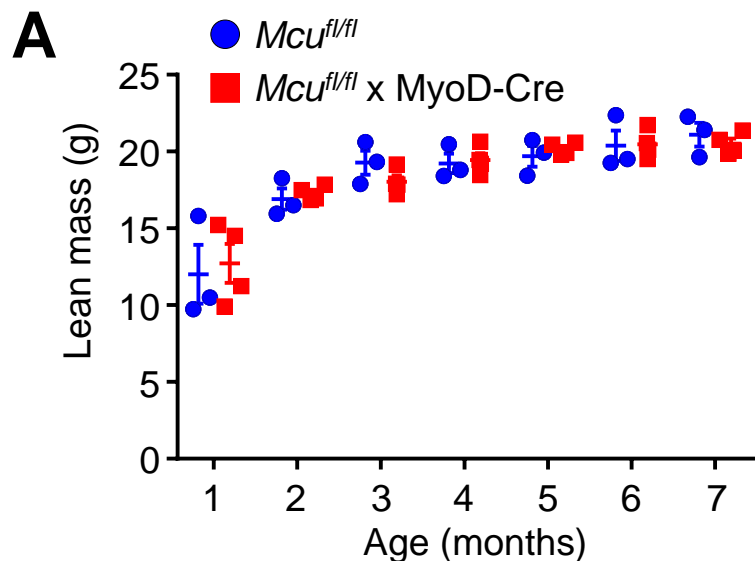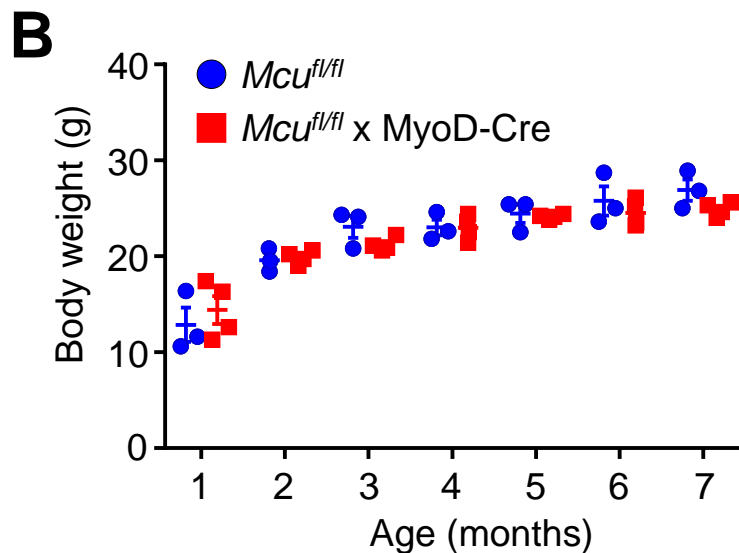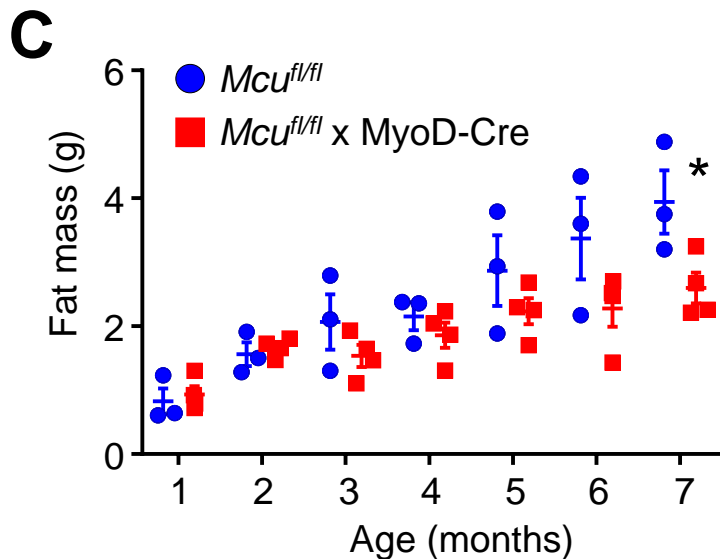

**Supplemental Figure 5. MRI analyses of total body composition with aging in mice.**

(A) Lean body mass, (B) total body mass, and (C) total fat mass in the indicated genotypes of mice. Values represented as mean  $\pm$  SEM. \* $P < 0.05$  versus *Mcu<sup>fl/fl</sup>* control.  $N = 3$  *Mcu<sup>fl/fl</sup>* and  $N = 4$  *Mcu<sup>fl/fl</sup>-MyoD-Cre* mice analyzed. While total body weight was not significantly different between the 2 groups, fat mass was significantly  $\sim 1.3$  g less in the *Mcu* deleted mice, although this was not enough to impact total body weight.

Supplementary Table\*. Metabolites in exercised muscle from *Mcu<sup>fl/fl-MyoD-Cre</sup>* (deleted) versus wildtype MyoD-Cre controls

| Metabolites      | Mcu wildtype (N=3) | Mcu-MyoD deleted (N=3) | P value |
|------------------|--------------------|------------------------|---------|
| AMP              | 38.49 ± 7.24 mM/mg | 80.95 ± 12.5 mM/mg     | 0.0071  |
| Carnosine        | 43.74 ± 17.7 mM/mg | 104.2 ± 20.0 mM/mg     | 0.0173  |
| Choline          | 3.799 ± 1.27 mM/mg | 7.626 ± 1.94 mM/mg     | 0.0464  |
| Citrate          | 6.383 ± 1.66 mM/mg | 12.13 ± 2.94 mM/mg     | 0.0421  |
| Creatine         | 349.6 ± 40.6 mM/mg | 799.1 ± 244 mM/mg      | 0.0346  |
| Glutamine        | 19.08 ± 1.62 mM/mg | 48.99 ± 12.0 mM/mg     | 0.0129  |
| Glycine          | 55.60 ± 11.6 mM/mg | 107.1 ± 22.4 mM/mg     | 0.0241  |
| Lactate          | 147.6 ± 21.6 mM/mg | 330.8 ± 31.6 mM/mg     | 0.0011  |
| Niacinamide      | 1.613 ± 0.08 mM/mg | 4.651 ± 1.29 mM/mg     | 0.0154  |
| O-Phosphocholine | 2.724 ± 1.80 mM/mg | 7.557 ± 1.97 mM/mg     | 0.0353  |
| Phenylalanine    | 1.375 ± 0.27 mM/mg | 2.887 ± 0.55 mM/mg     | 0.0129  |
| Taurine          | 639.1 ± 115 mM/mg  | 1270 ± 357 mM/mg       | 0.0437  |
| Trimethylamine   | 0.659 ± 0.07 mM/mg | 1.521 ± 0.51 mM/mg     | 0.0465  |
| Valine           | 4.595 ± 0.82 mM/mg | 8.390 ± 1.62 mM/mg     | 0.0226  |

\*Quadriceps muscle was harvested 2 min after exhaustion and muscles were snap frozen in liquid nitrogen and metabolite extraction was performed for acquisition of one-dimensional <sup>1</sup>H NMR spectra using a Bruker Avance II 600 MHz spectrometer (see Methods). Data are presented as Mean ± SD.
